# Supplementary material
Source: publisher figshare collection journal article supplement (https://frontiersin.figshare.com/ndownloader/files/25650656)
Supplement: Supplementary file [file 25650656]

Examination

mnpukb08examination

{ IASAlternateStandardGroup: .. Standard - vertical, alternative layout }

date

Query

Date of examination

dd.mm.yyyy

date\_examination {Date (dd.mm.yyyy), Date format: display}

{ IASAlternateStandardGroup: .. Standard - vertical, alternative layout }

Was examination performed

Query

Was examination performed

examination performed (1 - 102583)

no examination (phone interview) (2 - 102584)

no examination (other reason) (3 - 102585)

performed {Vertical Radiobutton} "was examination performed"

Notes on examination e.g. why was examination not performed?

optional

examination\_com {Textarea 3,80}

FOTO DOCUMENTATION

allowed (1 - 102586)

not allowd (0 - 102587)

foto\_doc {Horizontal Radiobutton}

VIDEO DOCUMENTATION

allowed (1 - 102586)

not allowd (0 - 102587)

video\_doc {Horizontal Radiobutton}

WAS VALIDATION PERFORMED?

Yes all of it with Andi Krieg (1 - 102588)

Yes part of it with Andi Krieg (2 - 102589)

Yes all of it with other orthopaedist (3 - 102590)

Yes part of it with other orthopaedist (4 - 102591)

No not yet (5 - 102592)

No not necessary (no questions) (6 - 102593)

validation\_performed {Vertical Radiobutton}

OTHER ORTHOPAEDIST'S NAME

orthop\_name {Textfield 60}

Date of validation

dd.mm.yyyy

1 of 15

04/03/2019, 11:05

date\_validation {Date (dd.mm.yyyy), Date format: display}

{ IASHeadline: ..... Headline }

LOWER EXTREMITY

{ IASAlternateStandardGroup: .. Standard - vertical, alternative layout }

GAIT, STANDING and ALIGNEMENT

Query

GAIT, STANDING and ALIGNEMENT tested

yes (1 - 101864)

no (2 - 101747)

gait\_tested {Horizontal Radiobutton}

Height

cm

height {Number 3,1}

{ IASAlternateStandardGroup: .. Standard - vertical, alternative layout }

INSPECTION OF LEG AXIS\_standing

Query

INSPECTION OF LEG AXIS\_standing

symmetric (1 - 102594)

asymmetric (2 - 102595)

leg\_axis\_standing {Horizontal Radiobutton}

1 = not further described

2 = more genu varum in affected limb

3 = more genu varum in unaffected limb

4 = more genu valgum in affected limb

5 =more genu valgum in unaffected limb

6 = more genu flexum in affected limb

7 = more genu flexum in unaffected limb

8 = more genu recurvatum in affected limb

9 = more genu recurvatum in unaffected limb

other

< Please choose >

leg\_axis\_stand\_det {Popup (Label Group)} "leg\_axis\_stand\_details"

specify

leg\_axis\_stand\_oth {Textfield 80} "leg\_axis\_stand\_oth"

{ IASAlternateStandardGroup: .. Standard - vertical, alternative layout }

INSPECTION OF VARUS/VALGUS DEFORMITY OF THE TALOCRURAL JOINT

Query

INSPECTION OF VARUS/VALGUS DEFORMITY OF THE TALOCRURAL JOINT

symmetric (1 - 102594)

asymmetric (2 - 102595)

talocrural {Horizontal Radiobutton}

1 = not further described

2 = more valgus in affected leg 3 = more valgus in unaffected leg

4 = more varus in affected leg

5 = more varus in unaffected leg

other

< Please choose >

talocrural\_det {Popup (Label Group)} "TALOCRURAL\_details"

specify

2 of 15

04/03/2019, 11:05

talocrural\_oth {Textfield 80} "TALOCRURAL\_oth"

{ IASAlternateStandardGroup: .. Standard - vertical, alternative layout }

INSPECTION OF TALOCRURAL AXIS

INSPECTION OF TALOCRURAL AXIS

physiological varization (1 - 103704)

no varization (0 - 103705)

talocrural\_axis {Horizontal Radiobutton}

{ IASAlternateStandardGroup: .. Standard - vertical, alternative layout }

PELVIC OBLIQUITY

PELVIC OBLIQUITY

number of centimeters required to reestablish symmetry

< Please choose > ▾

pelvic\_obl {Popup (Label Group)}

{ IASAlternateStandardGroup: .. Standard - vertical, alternative layout }

INSPECTION OF LEG AXIS\_walking

INSPECTION OF LEG AXIS\_walking

symmetric (1 - 102594)

asymmetric (2 - 102595)

leg\_axis\_walk {Horizontal Radiobutton}

1= not further described

2 = more internal rotation in affected leg

3 = more internal rotation in unaffected leg

4 = more external rotation in affected leg

5 = more external rotation in unaffected leg

other

< Please choose > ▾

leg\_axis\_walk\_det {Popup (Label Group)} "leg\_axis\_walk\_details"

specify

leg\_axis\_walk\_oth {Textfield 80} "leg\_axis\_walk\_oth"

{ IASAlternateStandardGroup: .. Standard - vertical, alternative layout }

Inspection of gait: participant walks through examination room

Inspection of gait: participant walks through examination room

symmetric (1 - 102594)

limping (2 - 104224)

gait\_walk {Horizontal Radiobutton}

{ IASAlternateStandardGroup: .. Standard - vertical, alternative layout }

Inspection of femoral torsion (prone position):

Inspection of femoral torsion (prone position)

symmetric (1 - 102594)

asymmetric (2 - 102595)

fem\_tor {Horizontal Radiobutton}

1 = not further described

2 = more antetorsion in affected limb

3 = more antetorsion in unaffected limb

other

< Please choose > ▾

fem\_tor\_det {Popup (Label Group)} "femoral torsion prone detail"

specify

fem\_tor\_oth {Textfield 80} "fem\_tor\_prone\_oth"

{ IASAlternateStandardGroup: .. Standard - vertical, alternative layout }

Inspection of tibial torsion (prone position, 90° flexion in knee)

Query

Inspection of tibial torsion (prone position, 90° flexion in knee)

symmetric (1 - 102594)

asymmetric (2 - 102595)

tib\_tor {Horizontal Radiobutton}

1 = not further described

2 = more internal rotation in affected tibia

3 = more internal rotation in unaffected tibia

4 = more external rotation in affected tibia

5 = more external rotation in unaffected tibia

other

< Please choose > ▾

tib\_tor\_det {Popup (Label Group)} "femoral torsion prone detail"

specify

tib\_tor\_oth {Textfield 80} "tib\_tor\_other"

{ IASAlternateStandardGroup: .. Standard - vertical, alternative layout }

Comments

Notes (gait)

Query

optional

notes\_gait {Textarea 10,100} "Notes (gait)"

{ IASHeadline: ..... Headline }

**SPECIFIC EXAMINATION: joints tested according to study protocol**

{ IASAlternateStandardGroup: .. Standard - vertical, alternative layout }

HIP

HIP

Tested?

Query

4 of 15

04/03/2019, 11:05

☐ yes (1 - 101864) ☐ no (2 - 101747)

tested\_hip {Horizontal Radiobutton}

Internal rotation (in prone position and supine position)

- 1 = symmetric
- 2 = deficit in affected
- 3 = deficit in unaffected

☐ 1 (1 - 101865) ☐ 2 (2 - 101866) ☐ 3 (3 - 101867)

hip\_int\_rot {Horizontal Radiobutton}

Extent of internal rotation deficit (degrees)

°

hip\_int\_rot\_deg {Number 2,0}

External rotation (in prone position and supine position)

- 1 = symmetric
- 2 = deficit in affected
- 3 = deficit in unaffected

☐ 1 (1 - 101865) ☐ 2 (2 - 101866) ☐ 3 (3 - 101867)

hip\_ext\_rot {Horizontal Radiobutton}

Extent of external rotation deficit (degrees)

°

hip\_ext\_rot\_deg {Number 2,0}

Was there any pain while examining rotation of the legs

- 1 = In affected limb
- 2 = in other limb
- 3 = both
- 4 = No

☐ 1 (1 - 101865) ☐ 2 (2 - 101866) ☐ 3 (3 - 101867) ☐ 4 (4 - 101868)

hip\_rot\_pain {Horizontal Radiobutton}

{ IASAlternateStandardGroup: .. Standard - vertical, alternative layout }

HIP abduc

Query

Abduction in both legs (supine position)

- 1 = symmetric
- 2 = deficit in affected
- 3 = deficit in unaffected

☐ 1 (1 - 101865) ☐ 2 (2 - 101866) ☐ 3 (3 - 101867)

hip\_abduc {Horizontal Radiobutton}

Extent of abduction deficit

abduc\_def {Number 2,0}

Was there any pain while examining abduction of the legs

- 1 = In affected limb
- 2 = in other limb
- 3 = both
- 4 = No

☐ 1 (1 - 101865) ☐ 2 (2 - 101866) ☐ 3 (3 - 101867) ☐ 4 (4 - 101868)

hip\_abduc\_pain {Horizontal Radiobutton}

```
{ IASAlternateStandardGroup: .. Standard - vertical, alternative layout }
```

## HIP flex and ext

## Query

## Thomas test for both legs (supine position)

1 = no deficit

**2 = flexion contracture of affected hip**

**3 = flexion contracture of unaffected hip**

**4 = flexion contracture in both hips**

1 (1 - 101865) 2 (2 - 101866) 3 (3 - 101867) 4 (4 - 101868)

hips\_thomas\_both {Horizontal Radiobutton}

### Flexion in both hips (supine position)

**1 = symmetric**

**2 = deficit in affected**

**3 = deficit in unaffected**

1 (1 - 101865)    2 (2 - 101866)    3 (3 - 101867)

hip\_flex\_both {Horizontal Radiobutton}

### Flexion in both hips (supine position)

```
hips_flex_def {Number 3,0}
```

### Extension in both hips (prone position)

**1 = symmetric**

**2 = deficit in affected**

**3 = deficit in unaffected**

1 (1 - 101865)   2 (2 - 101866)   3 (3 - 101867)

hip ext both {Horizontal Radiobutton}

### Extent of extension deficit (degree)

```
hips_ext def {Number 2,0}
```

## Drehmann-sign

 no drehmann sign (0 - 105012)  positive drehmann sign (1 - 105013)

hip drehmann sign {Horizontal Radiobutton}

**Was there any pain while examining flexion and extension of the legs**

1 = In affected limb

**2 = in other limb**

**3 = both**

4 = No

1 (1 - 101865) 2 (2 - 101866) 3 (3 - 101867) 4 (4 - 101868)

hip flex ext pain {Horizontal Radiobutton}

## Notes hip examination

**optional**

notes\_hip {Textarea 10,100}

{ IASAlternateStandardGroup: .. Standard - vertical, alternative layout }

KNEE  
KNEE

Query

Tested?

☐ yes (1 - 101864)

☐ no (2 - 101747)

tested\_knee {Horizontal Radiobutton}

Flexion (supine position)

- 1 = symmetric  
2 = deficit in affected  
3 = deficit in unaffected

☐ 1 (1 - 101865)

☐ 2 (2 - 101866)

☐ 3 (3 - 101867)

knee\_flex {Horizontal Radiobutton}

Extent of flexion deficit (degrees)

knee\_flex\_deficit {Number 3,0}

Extension (supine position)

- 1 = symmetric  
2 = deficit in affected  
3 = deficit in unaffected

☐ 1 (1 - 101865)

☐ 2 (2 - 101866)

☐ 3 (3 - 101867)

knee\_ext {Horizontal Radiobutton}

Extent of extension deficit

knee\_ext\_def {Number 2,0}

Was there any pain while examining flexion and extension of the knees

- 1 = In affected limb  
2 = in other limb  
3 = both  
4 = No

☐ 1 (1 - 101865)

☐ 2 (2 - 101866)

☐ 3 (3 - 101867)

☐ 4 (4 - 101868)

knee\_pain {Horizontal Radiobutton}

Notes knee examination

optional

notes\_knee {Textarea 10,100}

{ IASAlternateStandardGroup: .. Standard - vertical, alternative layout }

TALOCRURAL JOINT  
TALOCRURAL JOINT

Query

Tested?

☐ yes (1 - 101864)

☐ no (2 - 101747)

tested\_talocrural {Horizontal Radiobutton}

Plantar flexion

- 1 = symmetric  
2 = deficit in affected  
3 = deficit in unaffected

☐ 1 (1 - 101865)

☐ 2 (2 - 101866)

☐ 3 (3 - 101867)

talocr\_flex {Horizontal Radiobutton}

Extent of flexion deficit

°

talocr\_flex\_def {Number 2,0}

Dorsal extension

- 1 = symmetric  
2 = deficit in affected  
3 = deficit in unaffected

☐ 1 (1 - 101865)

☐ 2 (2 - 101866)

☐ 3 (3 - 101867)

talocr\_ext {Horizontal Radiobutton}

Extent of extension deficit

°

talocr\_ext\_def {Number 2,0}

Was there any pain while examining flexion and extension of the feet

- 1 = In affected limb  
2 = in other limb  
3 = both  
4 = No

☐ 1 (1 - 101865)

☐ 2 (2 - 101866)

☐ 3 (3 - 101867)

☐ 4 (4 - 101868)

talocr\_flex\_ext\_pain {Horizontal Radiobutton}

Pronation in both ankles

- 1 = symmetric  
2 = deficit in affected  
3 = deficit in unaffected

☐ 1 (1 - 101865)

☐ 2 (2 - 101866)

☐ 3 (3 - 101867)

talocr\_pron {Horizontal Radiobutton}

Supination in both ankles

- 1 = symmetric  
2 = deficit in affected  
3 = deficit in unaffected

☐ 1 (1 - 101865)

☐ 2 (2 - 101866)

☐ 3 (3 - 101867)

talocr\_supin {Horizontal Radiobutton}

Was there any pain while examining pro- and supination in ankle

- 1 = In affected limb  
2 = in other limb  
3 = both  
4 = No

☐ 1 (1 - 101865)

☐ 2 (2 - 101866)

☐ 3 (3 - 101867)

☐ 4 (4 - 101868)

talocr\_pro\_n\_pain {Horizontal Radiobutton}

Notes talocrural examination

optional

notes\_talocr {Textarea 10,100}

{ IASHeadline: ..... Headline }

UPPER EXTREMITY

{ IASAlternateStandardGroup: .. Standard - vertical, alternative layout }

LENGTH AND ALIGNEMENT UPPER EXTR

LENGTH AND ALIGNEMENT tested

☐ yes (1 - 101864)

☐ no (2 - 101747)

upper\_tested {Horizontal Radiobutton}

Length deficit

Assessment of arm length: placing palms on each other: lenght deficit when comparing fingers of both hands?

.

cm

length\_arm\_def {Number 2,1}

Inspection of arm axis

- 1 = Symmetric arm axis  
2= more varus in affected limb  
3 = more varus in unaffected limb  
4 = more valgus in affected limb  
5 = more valgus in unaffected limb

☐ 1 (1 - 101865)

☐ 2 (2 - 101866)

☐ 3 (3 - 101867)

☐ 4 (4 - 101868)

☐ 5 (5 - 103699)

arm\_axis {Horizontal Radiobutton}

Query

{ IASAlternateStandardGroup: .. Standard - vertical, alternative layout }

SHOULDER

SHOULDER

Tested?

yes (1 - 101864)

no (2 - 101747)

tested\_should {Horizontal Radiobutton}

Forward flexion

1 = symmetric

2 = deficit in affected

3 = deficit in unaffected

1 (1 - 101865)

2 (2 - 101866)

3 (3 - 101867)

should\_flex {Horizontal Radiobutton}

Extent of forward flexion deficit

°

should\_flex\_def {Number 3,0}

Extension

1 = symmetric

2 = deficit in affected

3 = deficit in unaffected

1 (1 - 101865)

2 (2 - 101866)

3 (3 - 101867)

should\_ext {Horizontal Radiobutton}

Extent of extension deficit

°

should\_ext\_def {Number 2,0}

Was there any pain while examining flexion and extension of the shoulders

1 = In affected limb

2 = in other limb

3 = both

4 = No

1 (1 - 101865)

2 (2 - 101866)

3 (3 - 101867)

4 (4 - 101868)

should\_flex\_ext\_paon {Horizontal Radiobutton}

Abduction of both arms

1 = symmetric

2 = deficit in affected

3 = deficit in unaffected

1 (1 - 101865)

2 (2 - 101866)

3 (3 - 101867)

should\_abduc {Horizontal Radiobutton}

Extent of abduction deficit

1 = symmetric

2 = deficit in affected

3 = deficit in unaffected

1 (1 - 101865)

2 (2 - 101866)

3 (3 - 101867)

should\_abduc\_def {Horizontal Radiobutton}

Was there any pain while examining abduction of the arms

1 = In affected limb

2 = in other limb

3 = both

4 = No

Query

☐ 1 (1 - 101865)

☐ 2 (2 - 101866)

☐ 3 (3 - 101867)

☐ 4 (4 - 101868)

should\_abduc\_pain {Horizontal Radiobutton}

External rotation of shoulder (90° flexion in elbow)

- 1 = symmetric  
2 = deficit in affected  
3 = deficit in unaffected

☐ 1 (1 - 101865)

☐ 2 (2 - 101866)

☐ 3 (3 - 101867)

should\_ext\_rot {Horizontal Radiobutton}

Extent of external rotation deficit (degrees)

°

should\_ext\_rot\_def {Number 3,0}

Internal rotation (90° flexion in elbow, placement of hand along the vertebrae)

- 1 = symmetric  
2 = deficit in affected  
3 = deficit in unaffected

☐ 1 (1 - 101865)

☐ 2 (2 - 101866)

☐ 3 (3 - 101867)

should\_int\_rot {Horizontal Radiobutton}

Extent of internal rotation deficit (difference of thumb location in cm)

°

should\_int\_rot\_def {Number 3,0}

Was there any pain while examining rotation of the arms

- 1 = In affected limb  
2 = in other limb  
3 = both  
4 = No

☐ 1 (1 - 101865)

☐ 2 (2 - 101866)

☐ 3 (3 - 101867)

☐ 4 (4 - 101868)

should\_rot\_pain {Horizontal Radiobutton}

Notes shoulder examination

optional

notes\_should {Textarea 10,100}

{ IASAlternateStandardGroup: .. Standard - vertical, alternative layout }

ELBOW  
ELBOW

Query

Tested?

☐ yes (1 - 101864)

☐ no (2 - 101747)

tested\_elb {Horizontal Radiobutton}

Flexion

- 1 = symmetric
- 2 = deficit in affected
- 3 = deficit in unaffected

☐ 1 (1 - 101865)

☐ 2 (2 - 101866)

☐ 3 (3 - 101867)

elb\_flex {Horizontal Radiobutton}

Extent of flexion deficit

°

elb\_flex\_def {Number 3,0}

Extension

- 1 = symmetric
- 2 = deficit in affected
- 3 = deficit in unaffected

☐ 1 (1 - 101865)

☐ 2 (2 - 101866)

☐ 3 (3 - 101867)

elb\_ext {Horizontal Radiobutton}

Extent of extension deficit

°

elb\_ext\_def {Number 2,0}

Inspection: Flexion contracture

- 1 = No contracture
- 2 = flexion contracture in affected arm
- 3 = flexion contracture in unaffected arm

☐ 1 (1 - 101865)

☐ 2 (2 - 101866)

☐ 3 (3 - 101867)

elb\_flex\_contr {Horizontal Radiobutton}

Was there any pain while examining flexion and extension of the shoulders

- 1 = In affected limb
- 2 = in other limb
- 3 = both
- 4 = No

☐ 1 (1 - 101865)

☐ 2 (2 - 101866)

☐ 3 (3 - 101867)

☐ 4 (4 - 101868)

elb\_flex\_ext\_pain {Horizontal Radiobutton}

Pronation in both arms

- 1 = symmetric
- 2 = deficit in affected
- 3 = deficit in unaffected

☐ 1 (1 - 101865)

☐ 2 (2 - 101866)

☐ 3 (3 - 101867)

elb\_pron {Horizontal Radiobutton}

Extent of pronation deficit

°

elb\_pron\_def {Number 3,0}

Supination in both arms

- 1 = symmetric
- 2 = deficit in affected
- 3 = deficit in unaffected

☐ 1 (1 - 101865)

☐ 2 (2 - 101866)

☐ 3 (3 - 101867)

elb\_sup {Horizontal Radiobutton}

Extent of supination deficit

°

elb\_sup\_def {Number 3,0}

Was there any pain while examining pro- and supination in elbows

1 = In affected limb

2 = in other limb

3 = both

4 = No

1 (1 - 101865)

2 (2 - 101866)

3 (3 - 101867)

4 (4 - 101868)

elb\_pron\_pain {Horizontal Radiobutton}

Notes elbow examination

optional

notes\_elb {Textarea 10,100}

{ IASAlternateStandardGroup: .. Standard - vertical, alternative layout }

WRIST

WRIST

Query

Tested?

yes (1 - 101864)

no (2 - 101747)

tested\_wrist {Horizontal Radiobutton}

Palmar flexion in both wrists

1 = symmetric

2 = deficit in affected

3 = deficit in unaffected

1 (1 - 101865)

2 (2 - 101866)

3 (3 - 101867)

wrist\_flex\_palm {Horizontal Radiobutton}

Extent of palmar flexion deficit

°

wrist\_flex\_palm\_def {Number 3,0}

Dorsal flexion in both wrists

1 = symmetric

2 = deficit in affected

3 = deficit in unaffected

1 (1 - 101865)

2 (2 - 101866)

3 (3 - 101867)

wrist\_flex\_dors {Horizontal Radiobutton}

Extent of dorsal extension deficit

wrist\_flex\_dors\_def {Number 2,0}

Was there any pain while examining flexion and extension of the hands

1 = In affected limb

2 = in other limb

3 = both

4 = No

1 (1 - 101865)

2 (2 - 101866)

3 (3 - 101867)

4 (4 - 101868)

wrist\_flex\_ext\_pain {Horizontal Radiobutton}

Ulnar abduction in both wrists

1 = symmetric

2 = deficit in affected

3 = deficit in unaffected

1 (1 - 101865)

2 (2 - 101866)

3 (3 - 101867)

wrist\_uln\_abd {Horizontal Radiobutton}

Extent of ulnar abduction deficit

wrist\_uln\_abd\_def {Number 3,0}

Radial abduction in both wrists

1 = symmetric

2 = deficit in affected

3 = deficit in unaffected

1 (1 - 101865)

2 (2 - 101866)

3 (3 - 101867)

wrist\_rad\_abd {Horizontal Radiobutton}

Extent of radial abduction deficit

wrist\_rad\_abd\_def {Number 3,0}

Was there any pain while examining the abduction of the hands

1 = In affected limb

2 = in other limb

3 = both

4 = No

1 (1 - 101865)

2 (2 - 101866)

3 (3 - 101867)

4 (4 - 101868)

wrist\_abd\_pain {Horizontal Radiobutton}

Notes wrist examination

optional

notes\_wrist {Textarea 10,100}

{ IASHeadline: ..... Headline }

Comments general

{ IASAlternateStandardGroup: .. Standard - vertical, alternative layout }

Comments

optional

comments {Textarea 10,100} "Comments general"

Query

|                    |                         |
|--------------------|-------------------------|
| leg_axis_stand_det | 1. 1 (1 - 101865)       |
|                    | 2. 2 (2 - 101866)       |
|                    | 3. 3 (3 - 101867)       |
|                    | 4. 4 (4 - 101868)       |
|                    | 5. 5 (5 - 103699)       |
|                    | 6. 6 (6 - 103700)       |
|                    | 7. 7 (7 - 103701)       |
|                    | 8. 8 (8 - 103702)       |
|                    | 9. 9 (9 - 103703)       |
|                    | 10. other (99 - 101752) |
| talocrural_det     | 1. 1 (1 - 101865)       |
|                    | 2. 2 (2 - 101866)       |
|                    | 3. 3 (3 - 101867)       |
|                    | 4. 4 (4 - 101868)       |
|                    | 5. 5 (5 - 103699)       |
|                    | 10. other (99 - 101752) |
| pelvic_obl         | 1. 0 (0 - 103706)       |
|                    | 2. 0-1 (1 - 103707)     |
|                    | 3. 1-2 (2 - 103708)     |
|                    | 4. 2-3 (3 - 103709)     |
|                    | 5. 3-4 (4 - 103710)     |
|                    | 6. 4-5 (5 - 103711)     |
| leg_axis_walk_det  | 1. 1 (1 - 101865)       |
|                    | 2. 2 (2 - 101866)       |
|                    | 3. 3 (3 - 101867)       |
|                    | 4. 4 (4 - 101868)       |
|                    | 5. 5 (5 - 103699)       |
|                    | 10. other (99 - 101752) |
| fem_tor_det        | 1. 1 (1 - 101865)       |
|                    | 2. 2 (2 - 101866)       |
|                    | 3. 3 (3 - 101867)       |
|                    | 10. other (99 - 101752) |
| tib_tor_det        | 1. 1 (1 - 101865)       |
|                    | 2. 2 (2 - 101866)       |
|                    | 3. 3 (3 - 101867)       |
|                    | 5. 4 (4 - 101868)       |
|                    | 6. 5 (5 - 103699)       |
|                    | 10. other (99 - 101752) |
